# Supplementary figures and images for: Privacy Protection and Statistical Efficiency Trade-Off for Federated Learning
Source: Atypon-hosted journal article supplement (doi:10.1287/ijoc.2024.0554), 2025-07-15

$\gamma = 0.2$ 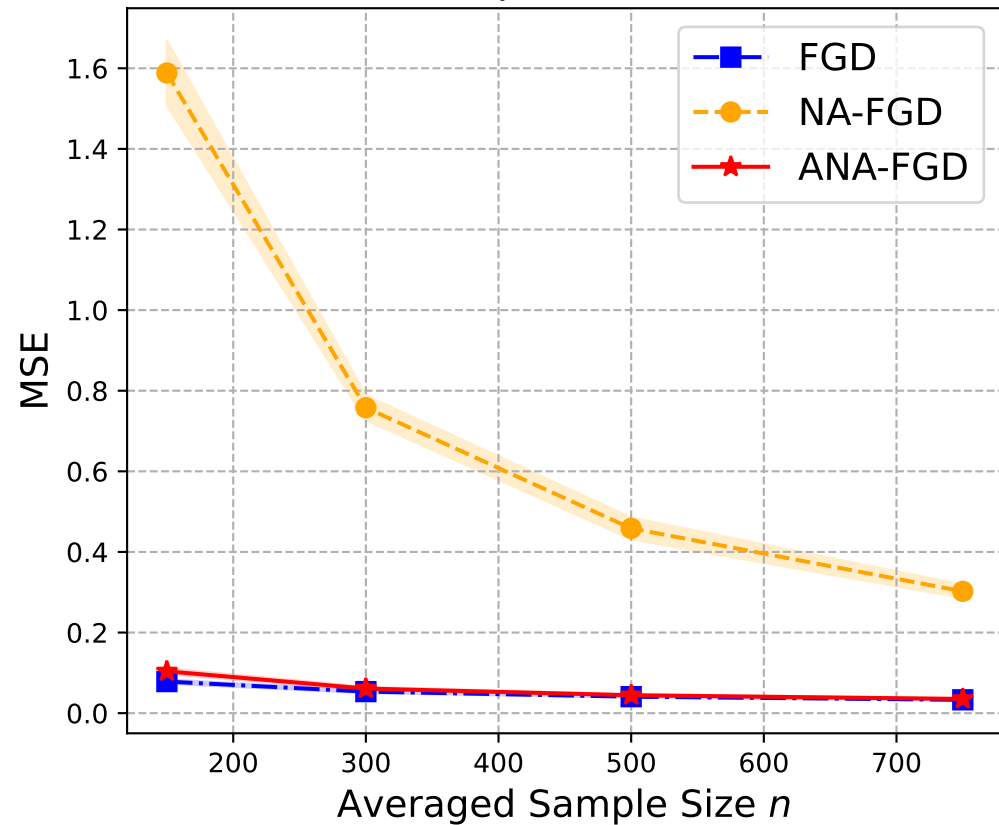 $\gamma = 0.5$ 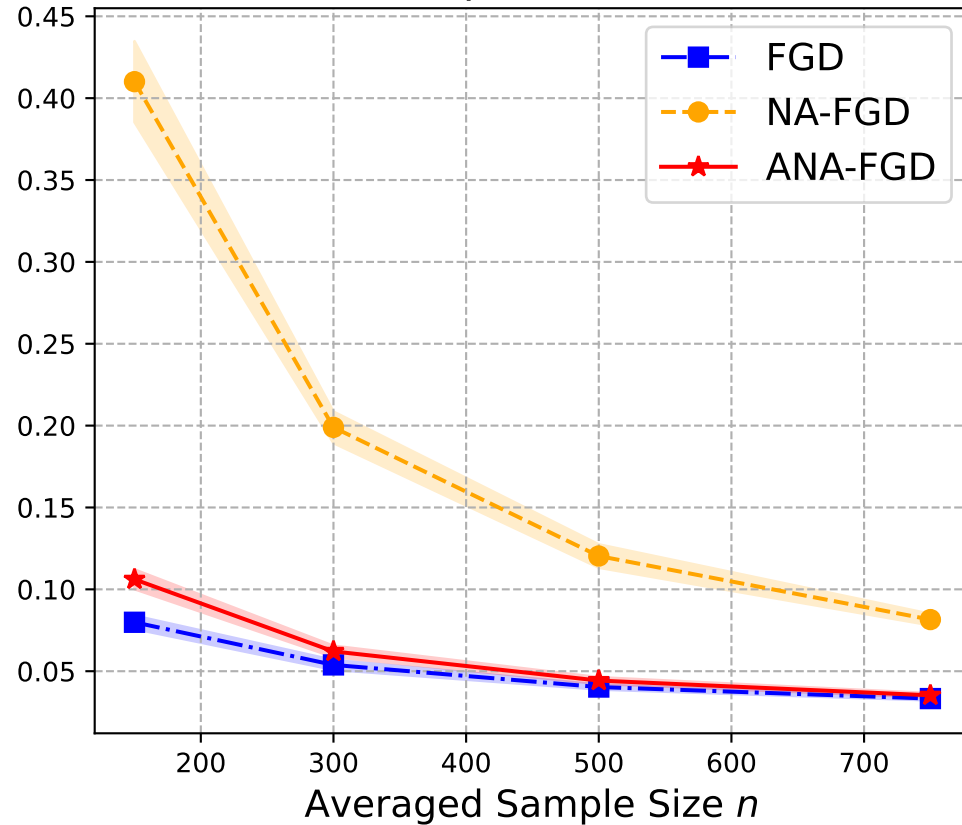 $\gamma = 0.8$ 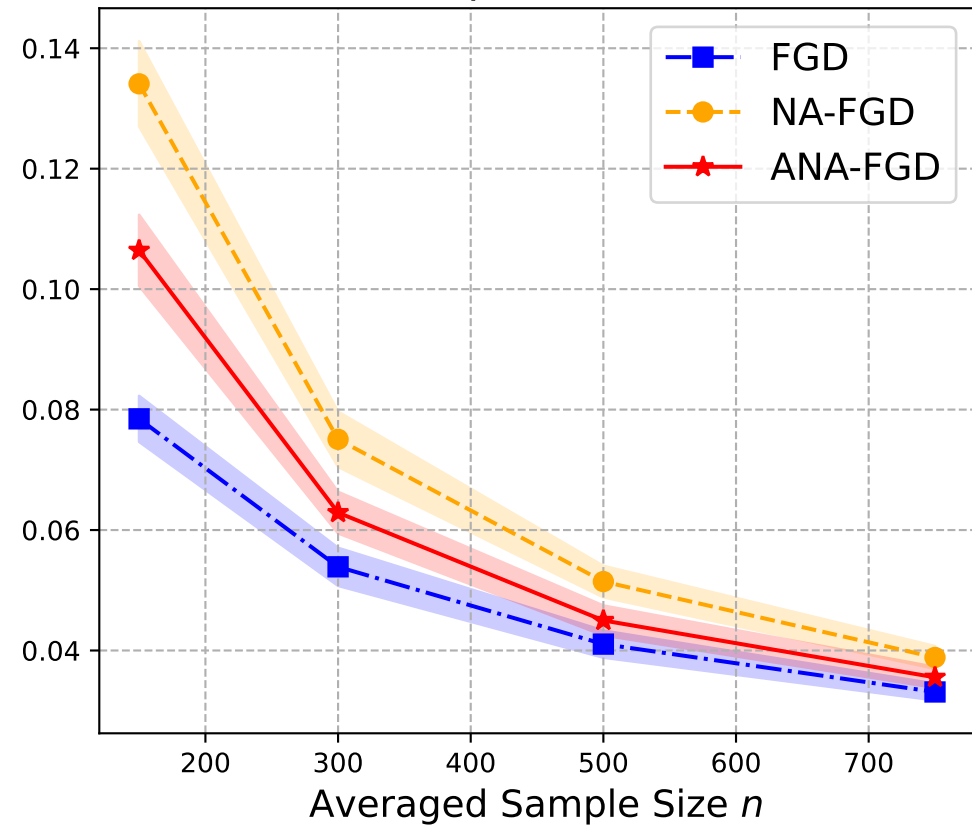

Supplement: ijoc.2024.0554.cd.zip [file learningrate_sparse.pdf › 2024.0554-main/results/learningrate_sparse.pdf]

$\varepsilon = 0.8$ 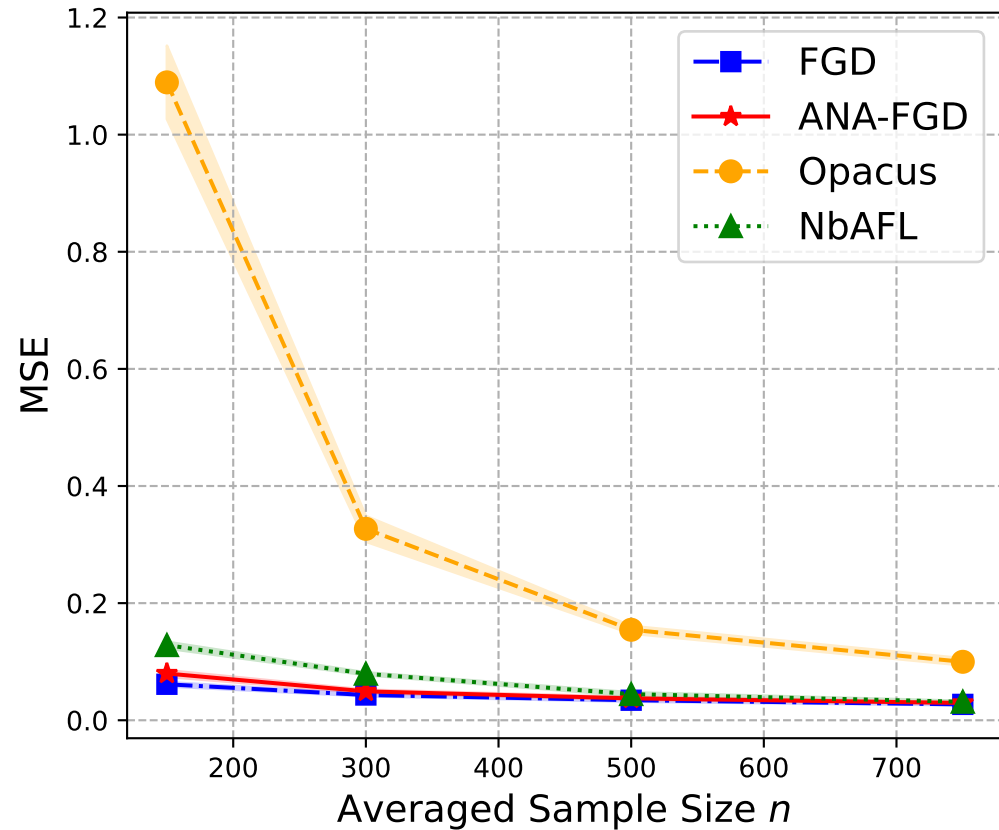 $\varepsilon = 2$ 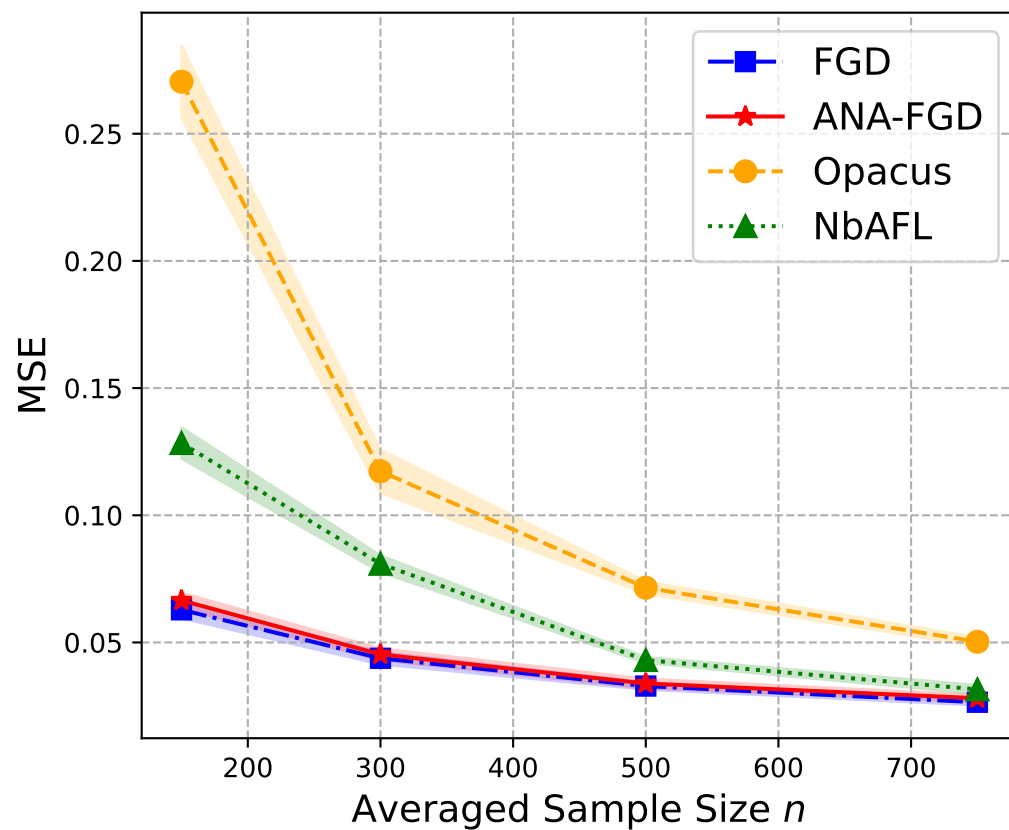 $\varepsilon = 5$ 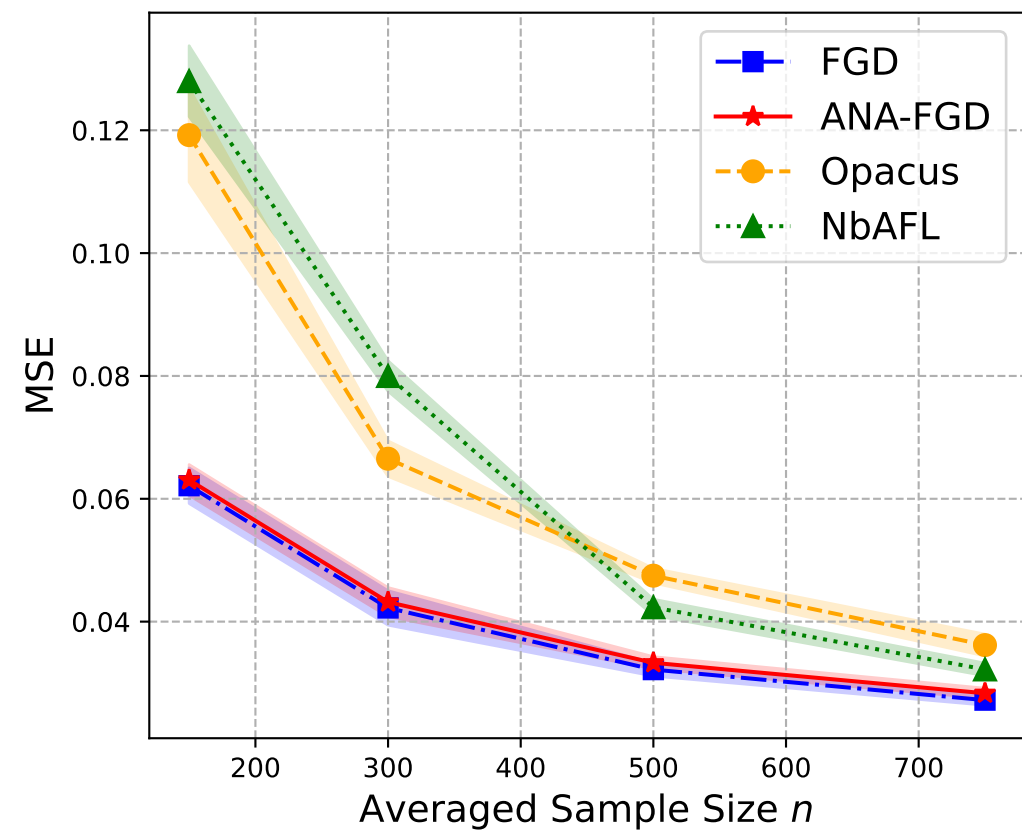

Supplement: ijoc.2024.0554.cd.zip [file linear_comparison.pdf › 2024.0554-main/results/linear_comparison.pdf]

$\varepsilon = 0.8$ 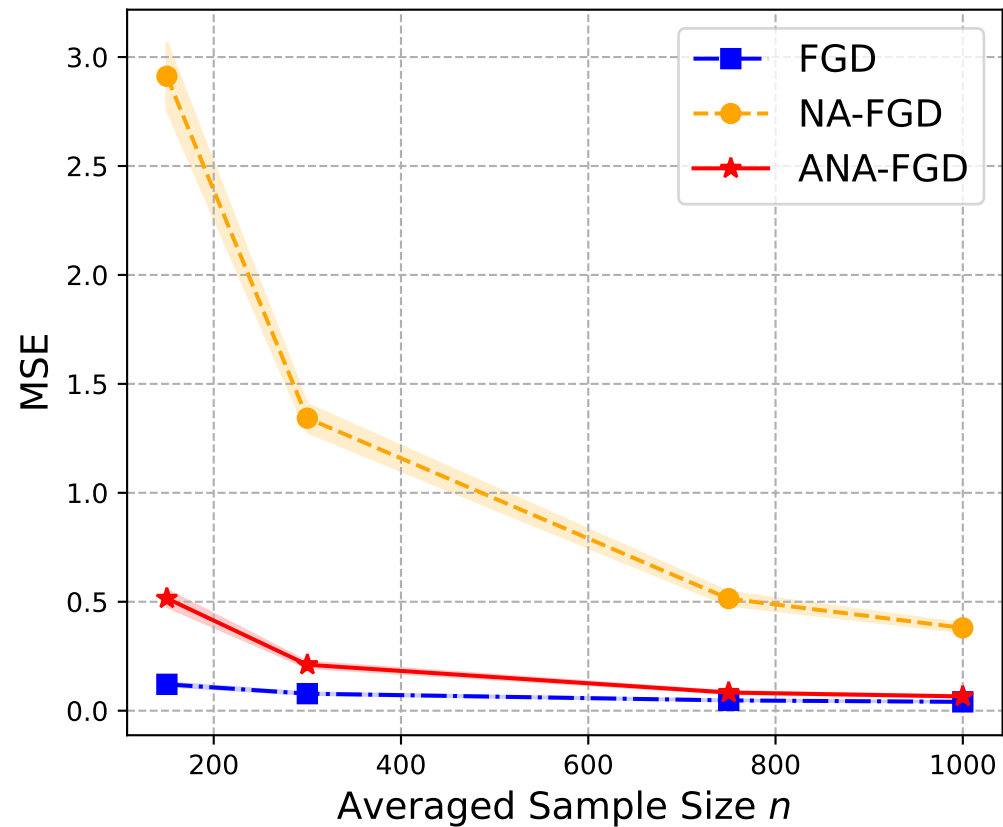 $\varepsilon = 2$ 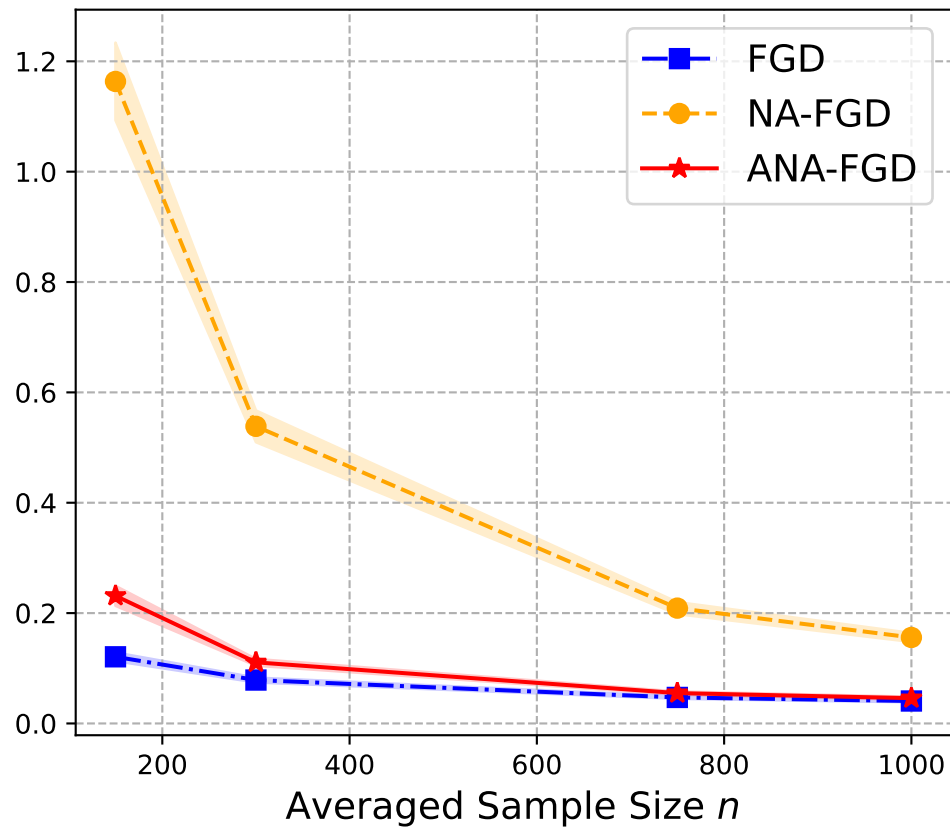 $\varepsilon = 5$ 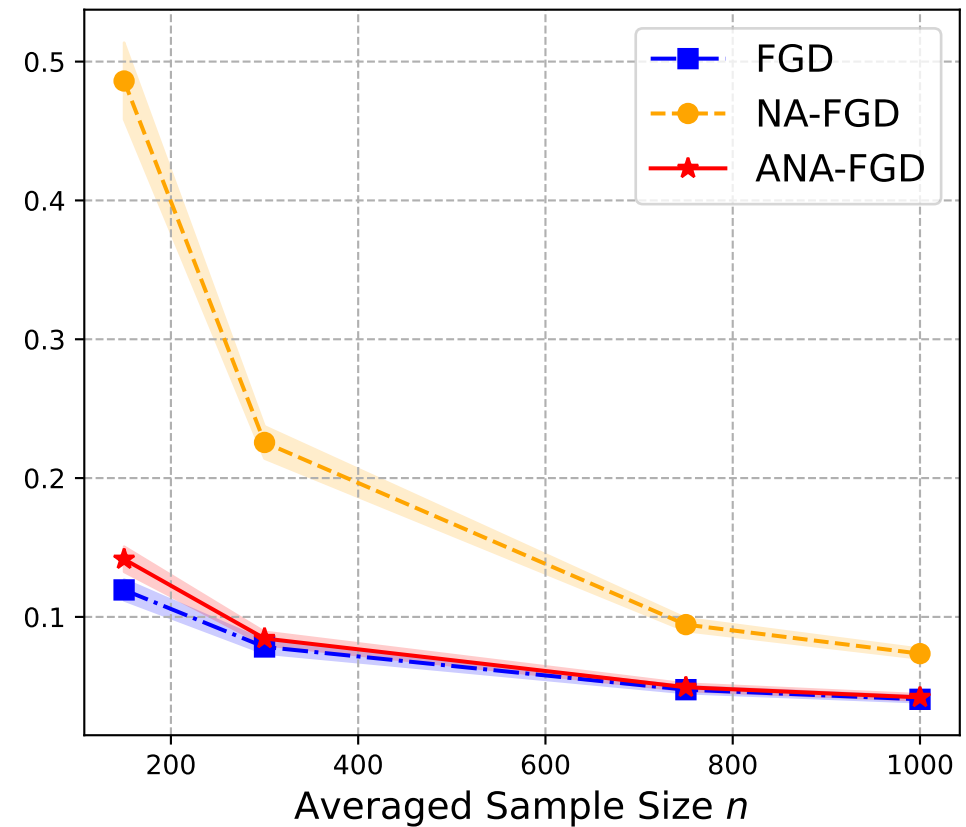

Supplement: ijoc.2024.0554.cd.zip [file linear_laplace.pdf › 2024.0554-main/results/linear_laplace.pdf]

$\varepsilon = 0.8$ 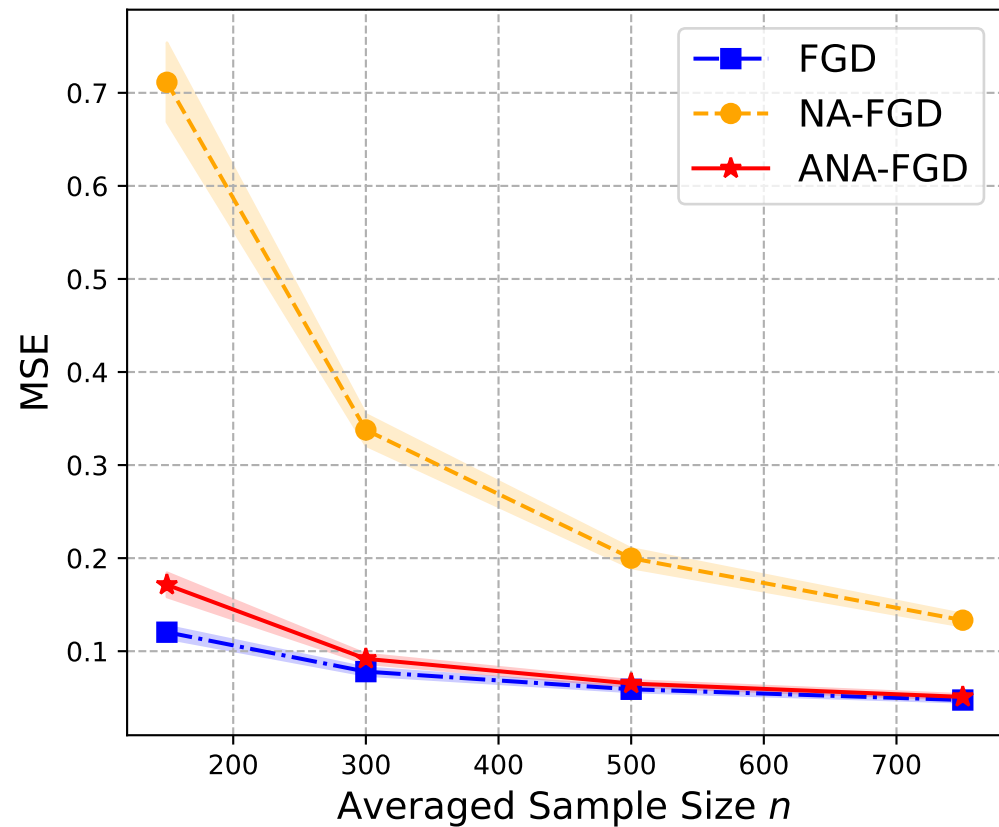 $\varepsilon = 2$ 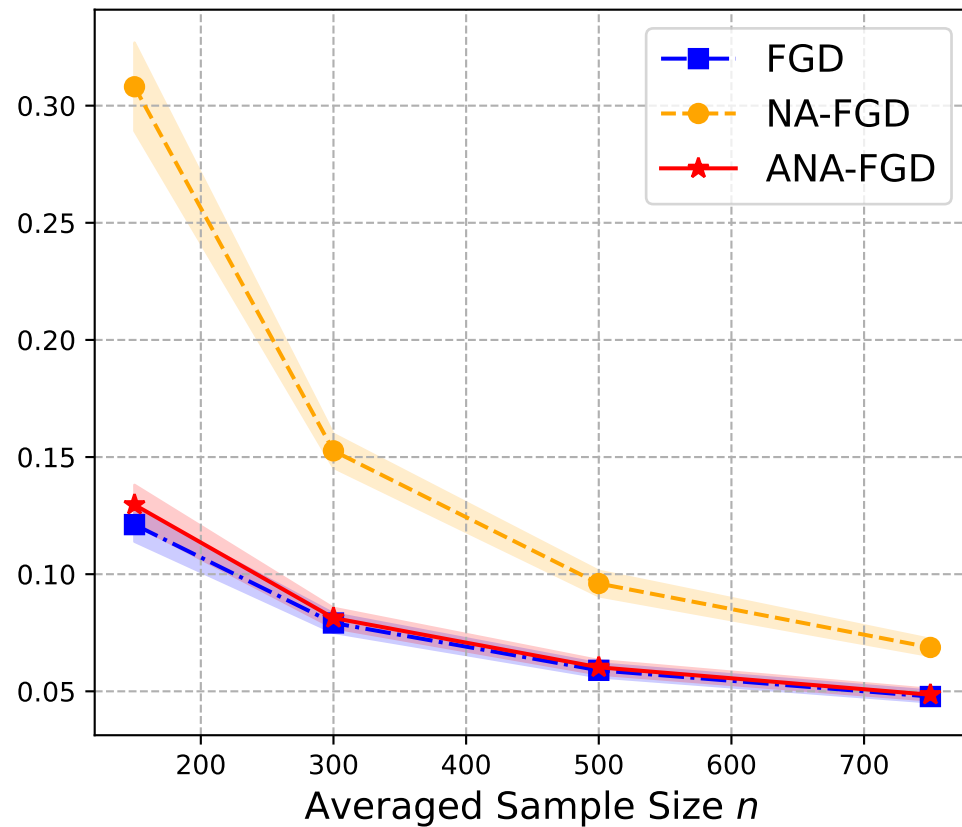 $\varepsilon = 5$ 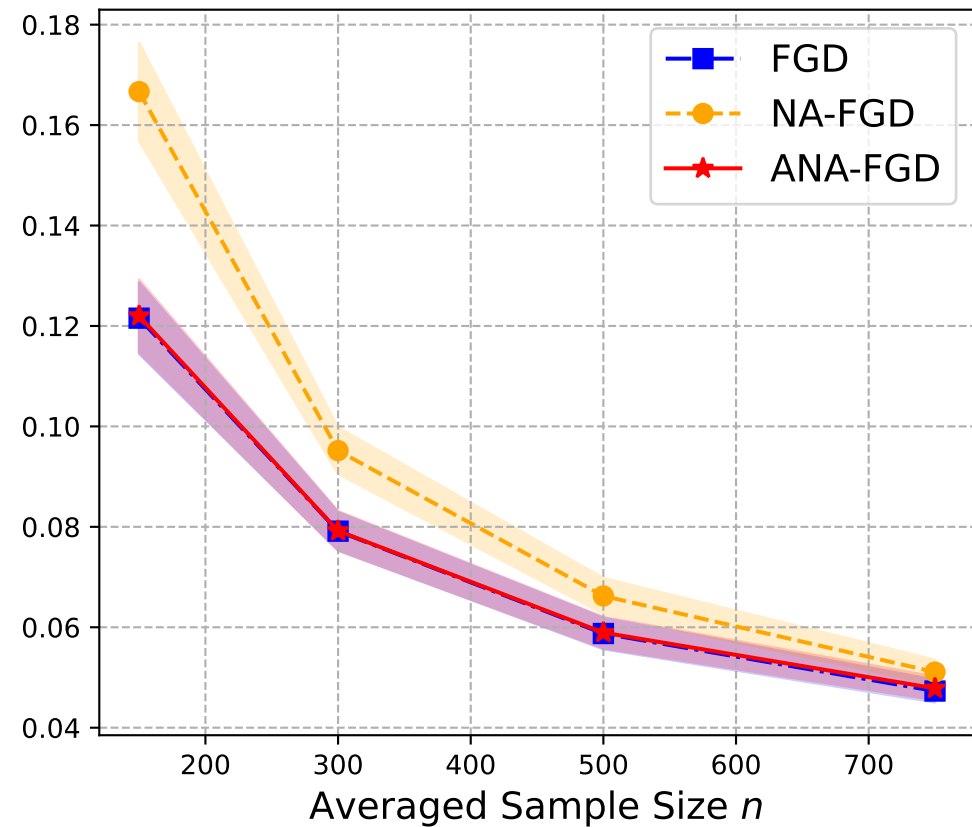

Supplement: ijoc.2024.0554.cd.zip [file linear_sparse.pdf › 2024.0554-main/results/linear_sparse.pdf]

$K = 5$ 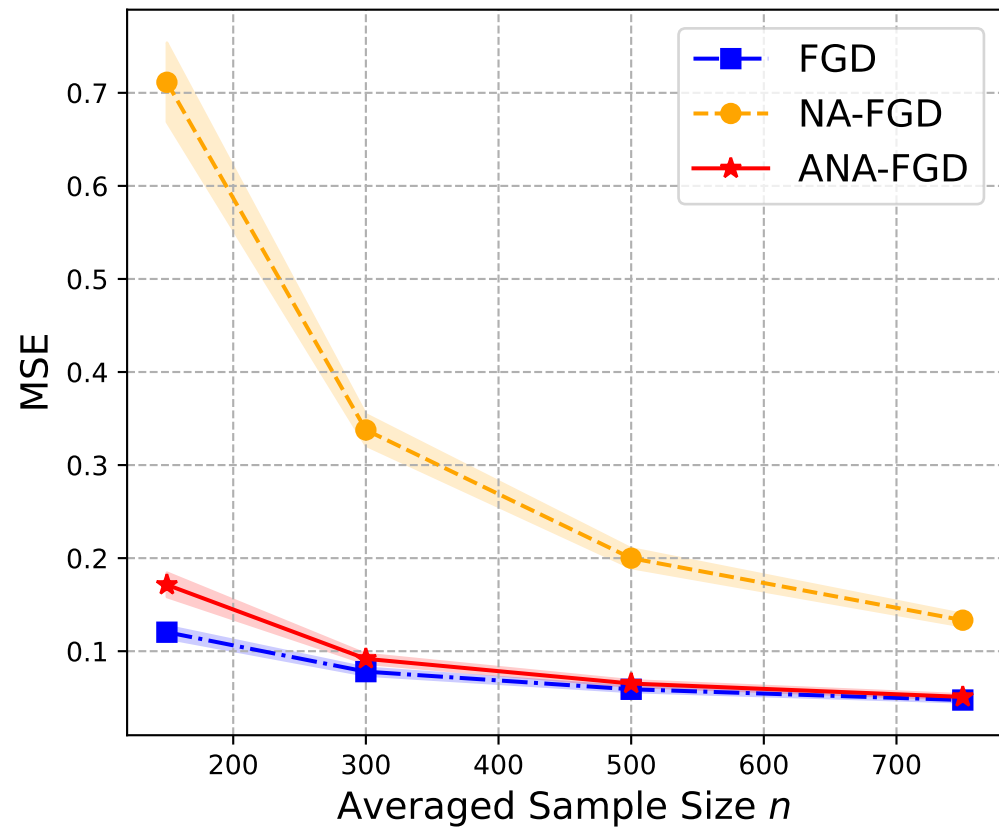 $K = 15$ 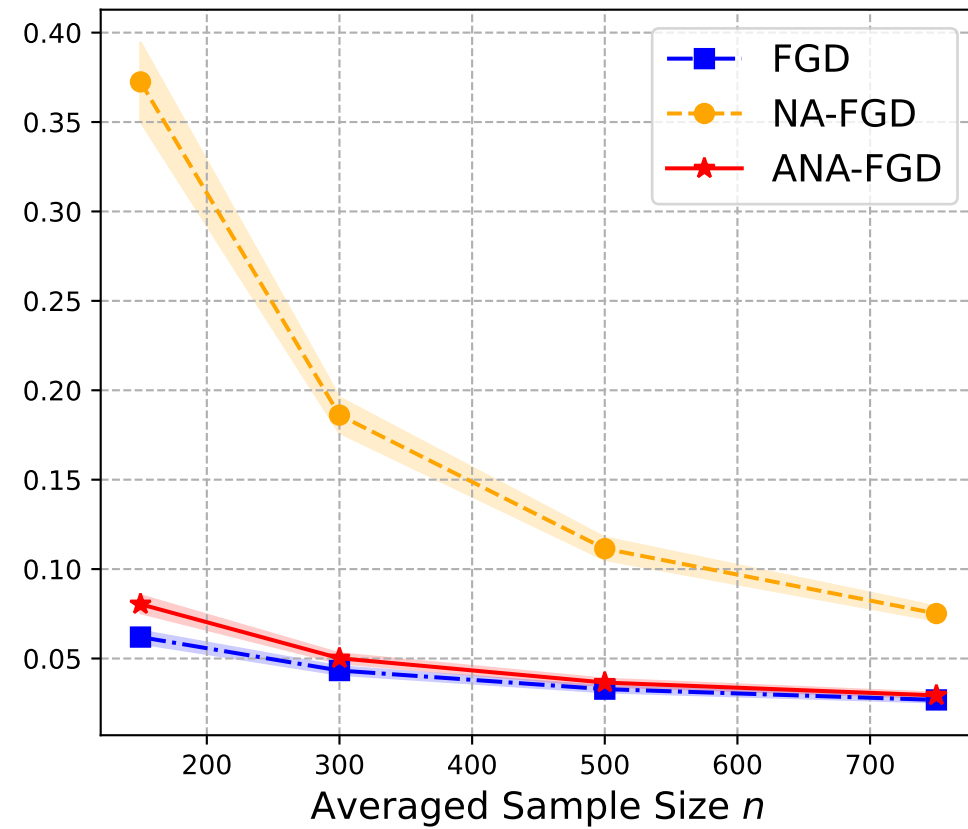 $K = 30$ 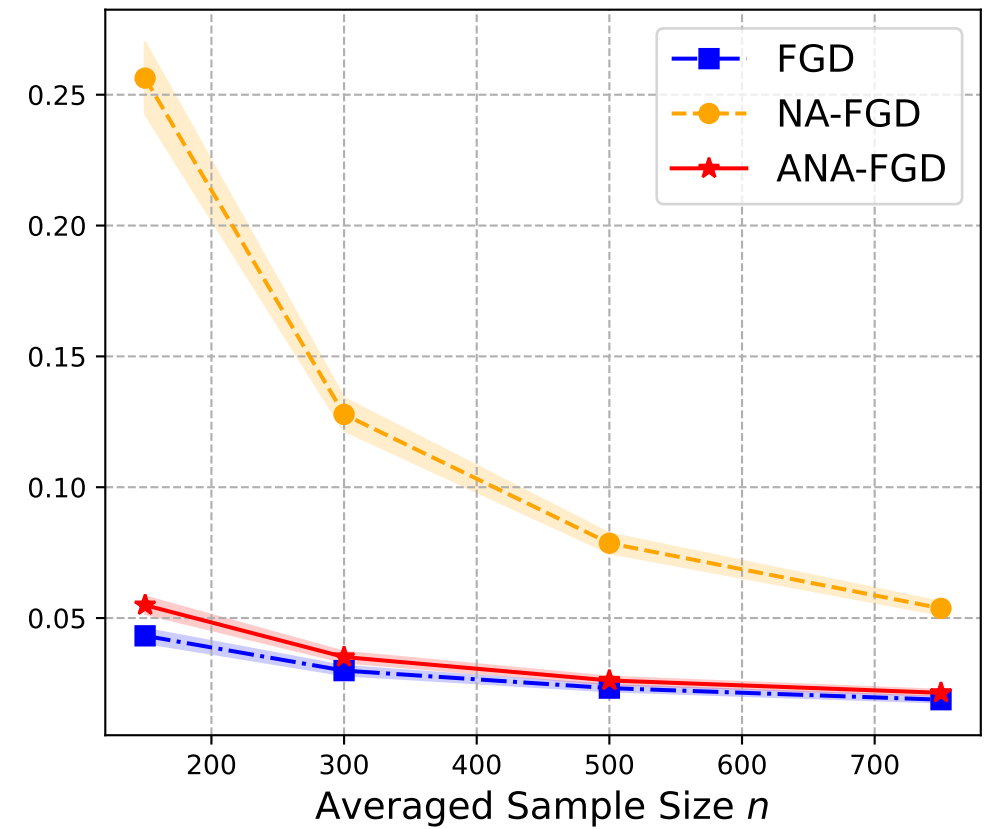

Supplement: ijoc.2024.0554.cd.zip [file linear_sparse_K.pdf › 2024.0554-main/results/linear_sparse_K.pdf]

$$\Delta = \sqrt{n}$$

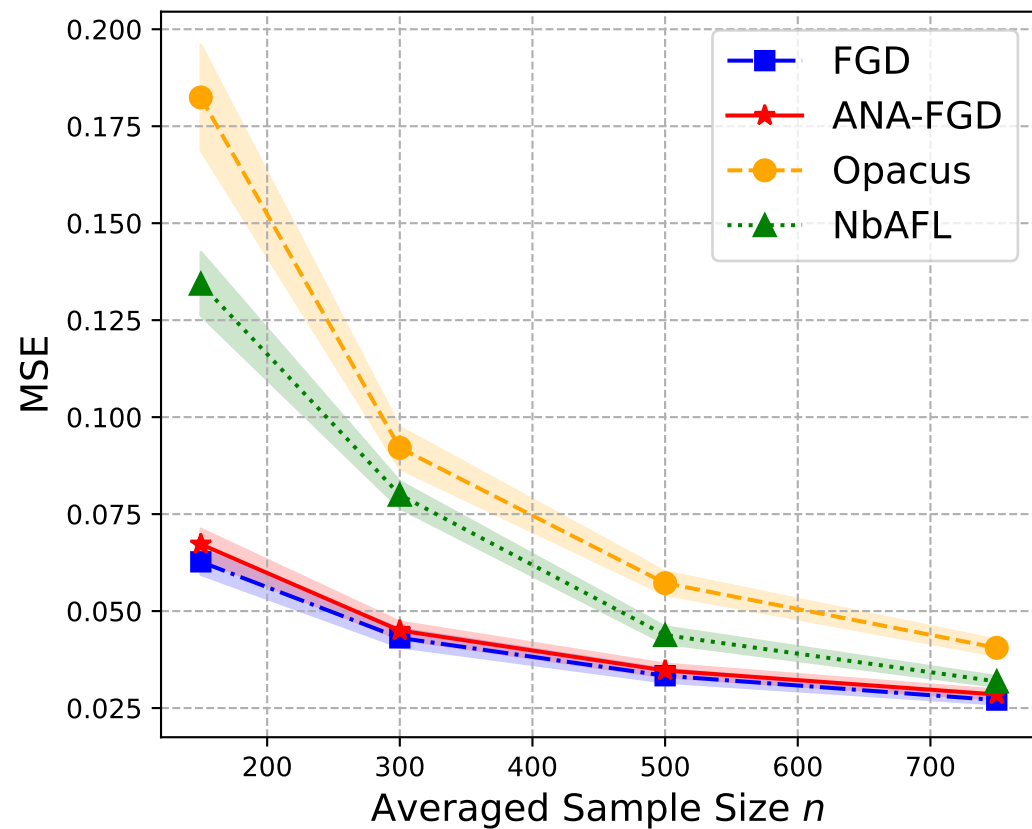

$$\Delta = 3\sqrt{n}$$

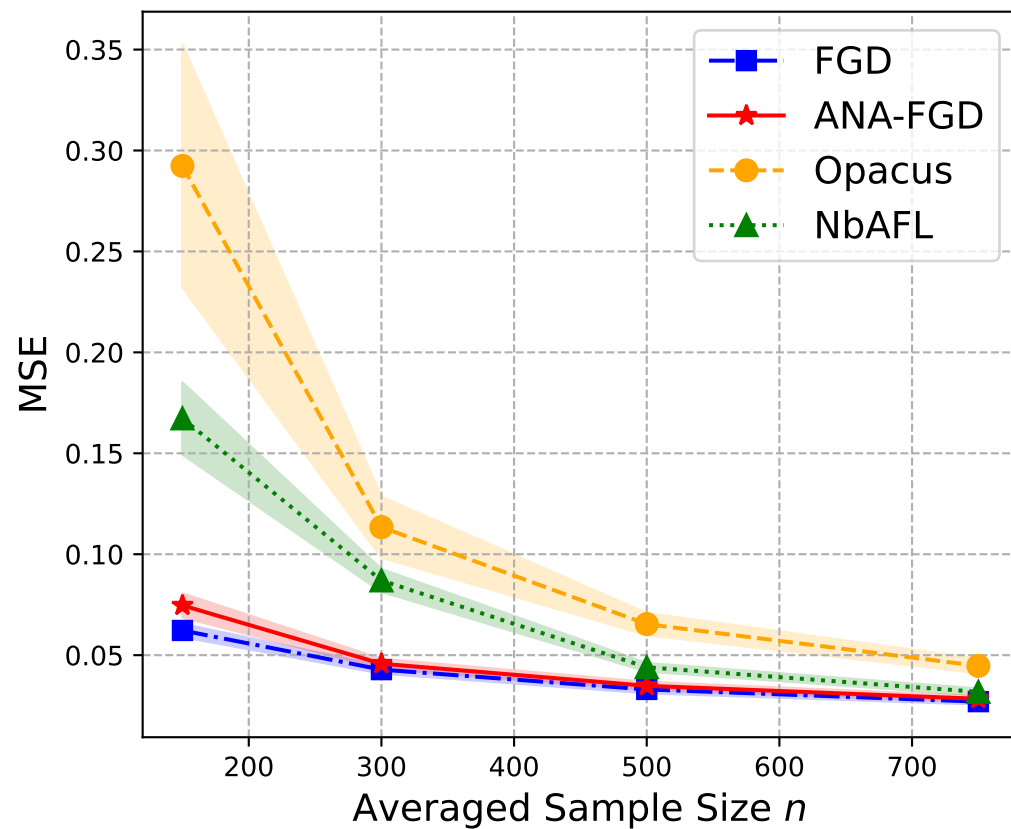

$$\Delta = 5\sqrt{n}$$

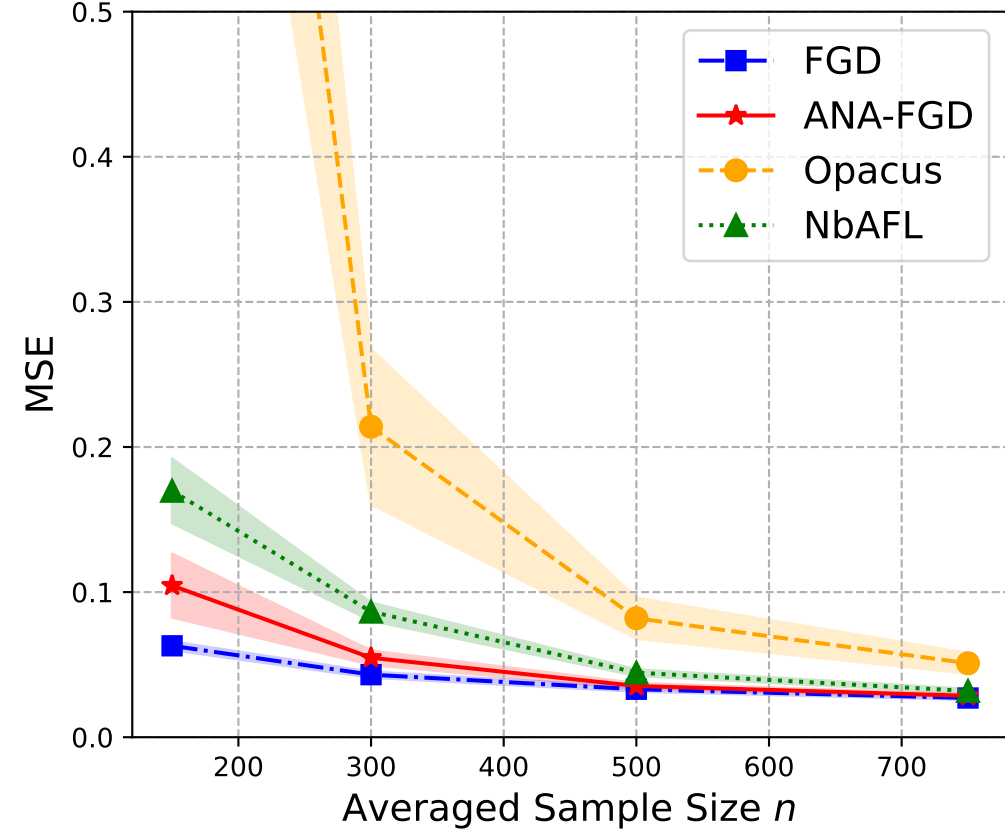

Supplement: ijoc.2024.0554.cd.zip [file linear_unbalance.pdf › 2024.0554-main/results/linear_unbalance.pdf]

$\varepsilon = 0.5$ 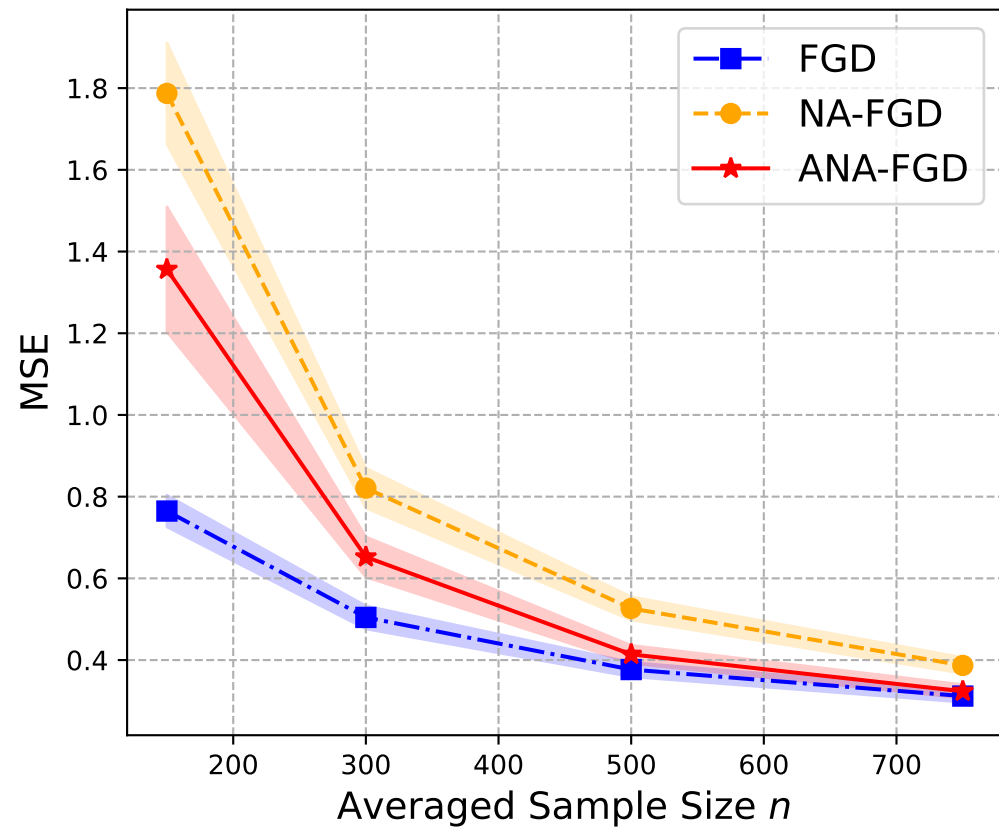 $\varepsilon = 0.8$ 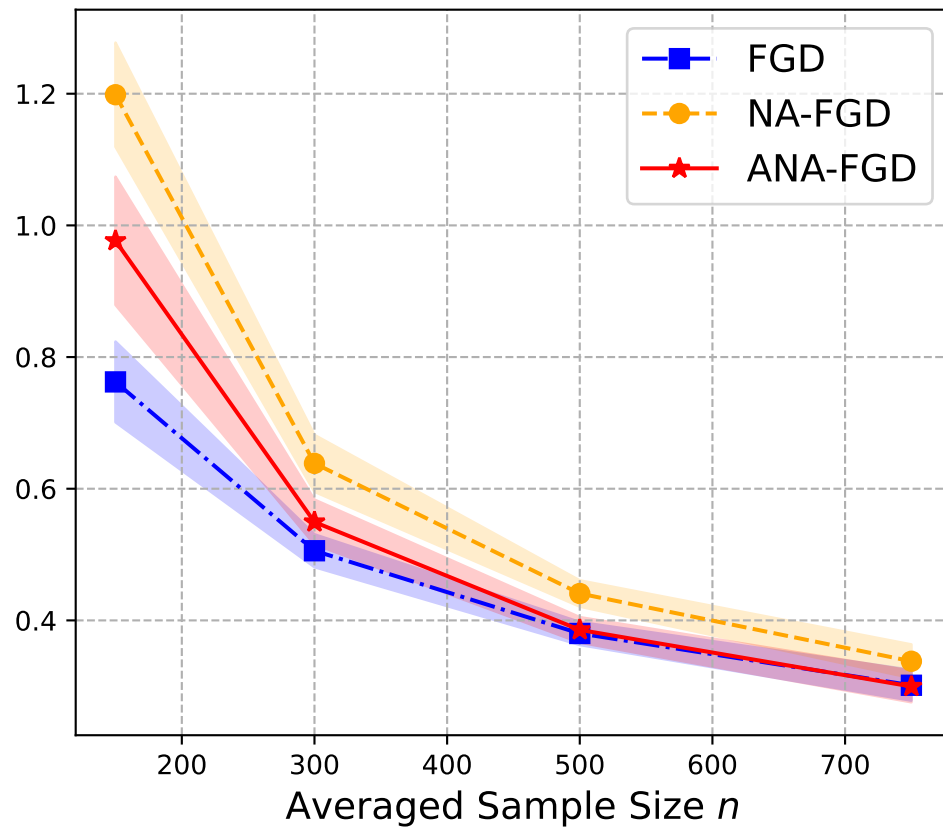 $\varepsilon = 1$ 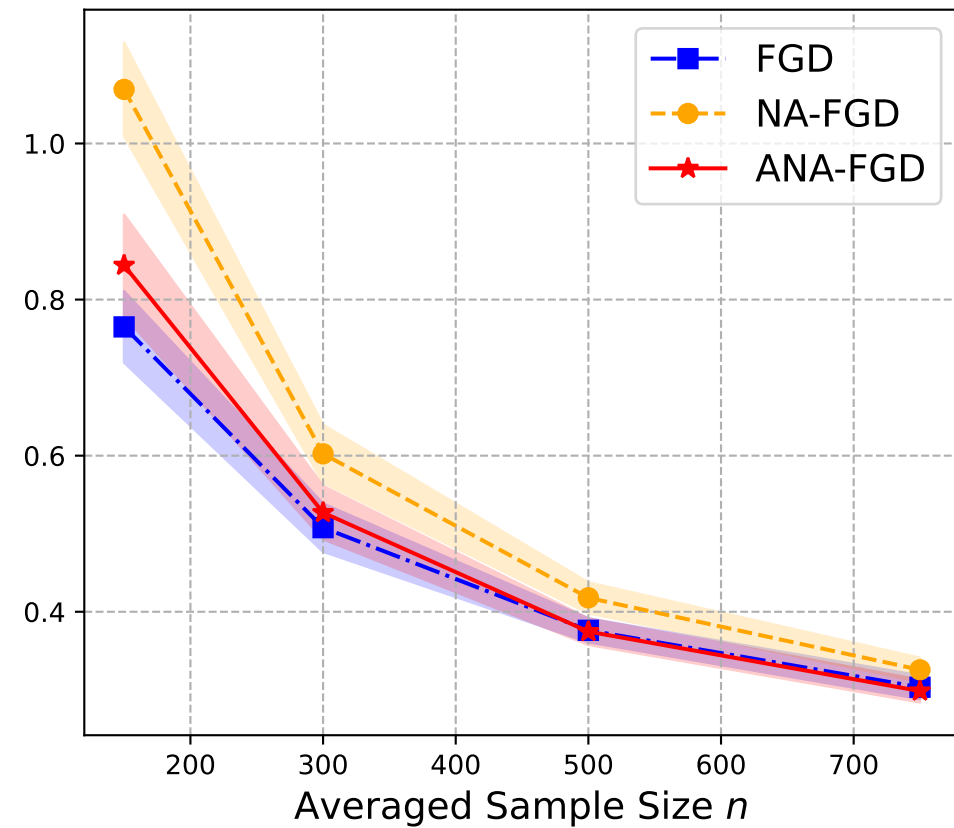

Supplement: ijoc.2024.0554.cd.zip [file logit_sparse.pdf › 2024.0554-main/results/logit_sparse.pdf]

$\varepsilon = 0.5$ 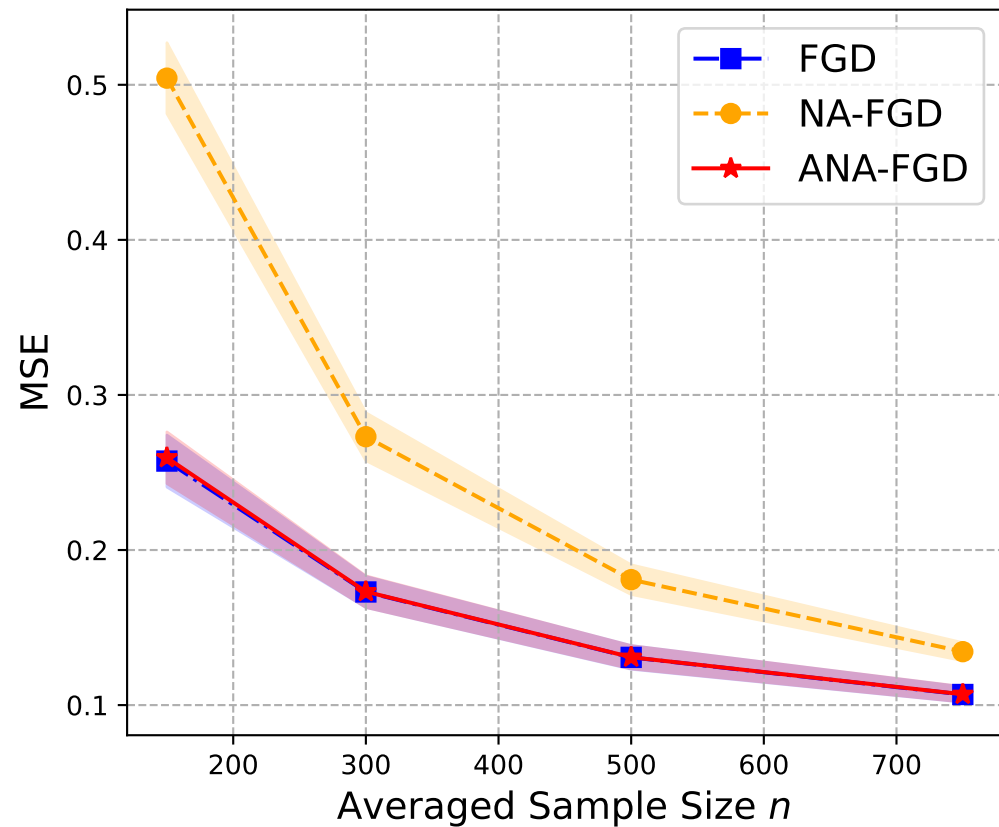 $\varepsilon = 0.8$ 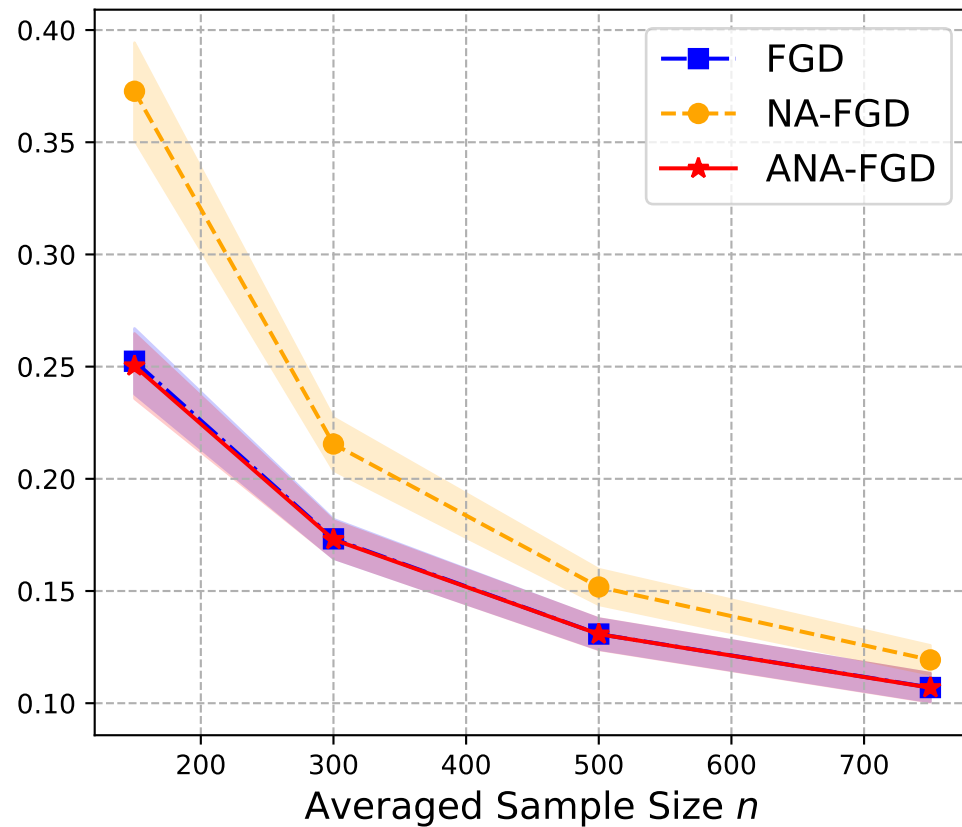 $\varepsilon = 1$ 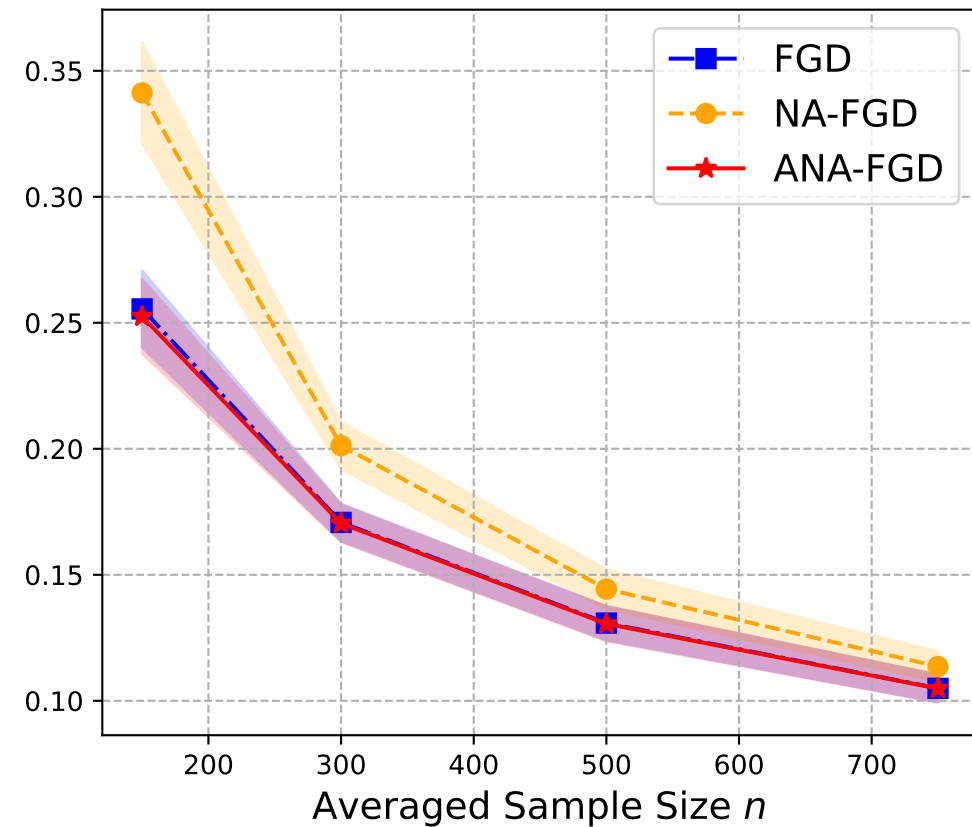

Supplement: ijoc.2024.0554.cd.zip [file poisson_sparse.pdf › 2024.0554-main/results/poisson_sparse.pdf]
